# Supplementary material
Source: PubMed Central journal article supplement (PMC6620395)
Supplement: JB.00707-18-s0001.pdf [file JB.00707-18-s0001.pdf]

1 **Supplemental material**

2

3 **Metabolomics studies to decipher stress responses in *Mycobacterium smegmatis* point to a**  
4 **putative pathway of methylated amines biosynthesis**

5

6 Arshad Rizvi<sup>1\*</sup>, Saleem Yousf<sup>2\*</sup>, Kannan Balakrishnan<sup>1</sup>, Harish Kumar Dubey<sup>1</sup>, Shekhar C.  
7 Mande<sup>4,5</sup>, Jeetender Chugh<sup>2,3#</sup>, Sharmistha Banerjee<sup>1#</sup>

8

9 <sup>1</sup>Department of Biochemistry, School of Life Sciences, University of Hyderabad, Hyderabad,  
10 Telangana 500046, India

11 <sup>2</sup>Department of Chemistry, Indian Institute of Science Education and Research (IISER), Pune,  
12 Maharashtra 411008, India

13 <sup>3</sup>Department of Biology, Indian Institute of Science Education and Research (IISER), Pune,  
14 Maharashtra 411008, India

15 <sup>4</sup>National Centre for Cell Science, Pune 411007, Maharashtra, India

16 <sup>5</sup>Present affiliation: Council of Scientific & Industrial Research (CSIR), Anusandhan Bhawan, 2  
17 Rafi Marg, New Delhi-110001, India

18

19 \*Authors contributed equally

20 #To whom correspondence may be addressed

21 Sharmistha Banerjee, PhD

22 Professor

23 Room No. F-60

24 Department of Biochemistry, School of Life Sciences

25 University of Hyderabad, Gachibowli, Hyderabad

26 Telangana, India

27 PIN - 500046

28 Phone (Office): +91-40-23134573

29 Phone (Lab): +91-40-23134673

30 Email ID: sbsl@uohyd.ac.in

31 **and**

32 JeetenderChugh, PhD

33 Assistant Professor

34 C-115, Main Building

35 Indian Institute of Science Education & Research,

36 Dr. Homi Bhabha Road, Pashan, Pune

37 Maharashtra, India

38 PIN – 411008

39 Phone (Office): +91-20-25908121

40 Phone (Lab): +91-20-25908231, +91-20-25909264

41 Email ID: cjeet@iiserpune.ac.in

42

43 **Running title:** *Stress-induced metabolic changes in mycobacteria*

44

45

46

47

48

49 **Differential metabolites associated with stresses**

50 Fifty-six metabolites, including the standard DSS (4,4-dimethyl-4-silapentane-1-sulfonic acid),  
51 were thus identified and are marked on the <sup>1</sup>H NMR spectrum as shown in Fig S1a in the  
52 supplemental material. Five metabolites (GTP, CDP, tryptophan, fructose-1-6 biphosphate,  
53 fumarate) were excluded from analysis as their representative peaks were not clear in all spectra.  
54 All the fifty metabolites and their respective <sup>1</sup>H chemical shifts (in reference to DSS) have been  
55 listed in Table S1 in the supplemental material and were considered for further analysis. The  
56 normalized concentration data matrix obtained from each of the 10 experimental replicates for  
57 each experimental condition, namely acidic stress, oxidative stress, nutrient starvation and  
58 untreated (control), were analyzed using MetaboAnalyst software to assess the influence of these  
59 stresses on *M. smegmatis*. Both univariate and multivariate approaches with the required and  
60 recommended statistical analyses (1) were performed for listing the differential metabolic  
61 profiles. While Table S2 in the supplemental material lists all the metabolites identified, only the  
62 metabolites with a minimum cutoff of 1.2-fold change (FC >1.2), with statistical significance [p-  
63 value (p<0.05), and false discovery rate (FDR<0.05)] are considered to be differential in a stress  
64 condition as compared to the control. These metabolites are indicated in boldface in Table S2. A  
65 fold change of >1.2 (with p<0.05) was considered because immediate adaptive changes to  
66 stresses were expected to cause small differences at metabolite level rather than large  
67 differences. Similar cutoffs have been used and reported in earlier studies (2-5). With these  
68 parameters, univariate analysis showed an overall 31, 20, and 46 metabolites with differential  
69 levels in acidic stress, oxidative stress, and nutrient starvation respectively as compared to the  
70 control (Table S2a-c in the supplemental material). Analysis of variance (ANOVA) was used to  
71 determine statistically significant differences in the means between all the four groups (Table

72 S2d in the supplemental material). A graphical representation of individual metabolite levels in  
73 different stresses is represented as a heat map in Fig 1.

74 Further, multivariate analysis such as principal component analysis (PCA) and partial least  
75 squares-discriminate analysis (PLS-DA) was performed to examine the intrinsic variation in  
76 groups. The total variance explained by five components PCA analyses were 94.1% for acidic  
77 stress, 80.1% for oxidative stress, and 94.4% for nutrient starvation stress. The scores plot of the  
78 first two principal components PC1 and PC2 (Fig S2 in the supplemental material) showed  
79 visually distinct metabolite profiles of each stress as compared to the control. Percentage  
80 variance explained by PC1 and PC2 for the different stress conditions has been mentioned in  
81 their respective plots (Fig S2a-c in the supplemental material). When all the stresses were  
82 compared together with the control in a 3D-PCA plot (Fig S2d in the supplemental material),  
83 clear segregations were observed amongst stresses pointing to the distinctness in the metabolite  
84 profiles of different stresses as compared to the control. The 2D-PCA scores plot for a pairwise  
85 comparison of the three stress conditions *versus* control revealed that the maximum  
86 discriminatory features are in control *versus* nutrient starvation (Fig S2c in the supplemental  
87 material) followed by control *versus* acidic stress (Fig S2a in the supplemental material) and  
88 control *versus* oxidative stress (Fig S2b in the supplemental material). In the PLS-DA model,  
89 which has a higher discriminatory potential that is ideal for the classification of groups, showed  
90 further segregation between the groups over PCA analysis (Fig S3 in the supplemental  
91 material). To validate the PLS-DA model and avoid overfitting, 5-fold cross-validated scores  
92 from the model were used to calculate cross-validation parameter  $Q^2$ , which indicates the  
93 goodness of predictability and  $R^2$  that indicates goodness of fit of the model. A value of  $Q^2$  closer  
94 to 1 indicates a high prediction accuracy of the model. The values of  $R^2$  and  $Q^2$  in Table S3 in

95 the supplemental material indicated that models generated from our data had high predictive  
96 accuracy and this model is representative of true differences in metabolic profiles of respective  
97 stress conditions compared to control.

98

100 **Supplemental text References**

- 101 1. Xia J, Mandal R, Sinelnikov IV, Broadhurst D, Wishart DS.2012. MetaboAnalyst 2.0--a  
102 comprehensive server for metabolomic data analysis. *Nucleic Acids Res* 40:W127-33.
- 103 2. Feng Q, Liu Z, Zhong S, Li R, Xia H, Jie Z, Wen B, Chen X, Yan W, Fan Y, Guo Z,  
104 Meng N, Chen J, Yu X, Zhang Z, Kristiansen K, Wang J, Xu X, He K, Li G.2016.  
105 Integrated metabolomics and metagenomics analysis of plasma and urine identified  
106 microbial metabolites associated with coronary heart disease. *Sci Rep* 6:22525.
- 107 3. Hou W, Meng X, Zhao A, Zhao W, Pan J, Tang J, Huang Y, Li H, Jia W, Liu F.2018.  
108 Development of Multimarker Diagnostic Models from Metabolomics Analysis for  
109 Gestational Diabetes Mellitus (GDM). *Mol Cell Proteomics* 17:431-441.
- 110 4. Abdelrahman M, Sawada Y, Nakabayashi R, Sato S, Hirakawa H, El-Sayed M, Hirai  
111 MY, Saito K, Yamauchi N, Shigyo M.2015. Integrating transcriptome and target  
112 metabolome variability in doubled haploids of *Allium cepa* for abiotic stress protection.  
113 *Molecular Breeding* 35.
- 114 5. Wu H, Chen Y, Li ZG, Liu XH.2018. Untargeted metabolomics profiles delineate  
115 metabolic alterations in mouse plasma during lung carcinoma development using UPLC-  
116 QTOF/MS in MSE mode. *Royal Society Open Science* 5.
- 117

118

119 Supplemental material figures and tables

120 Figure S1

**a**

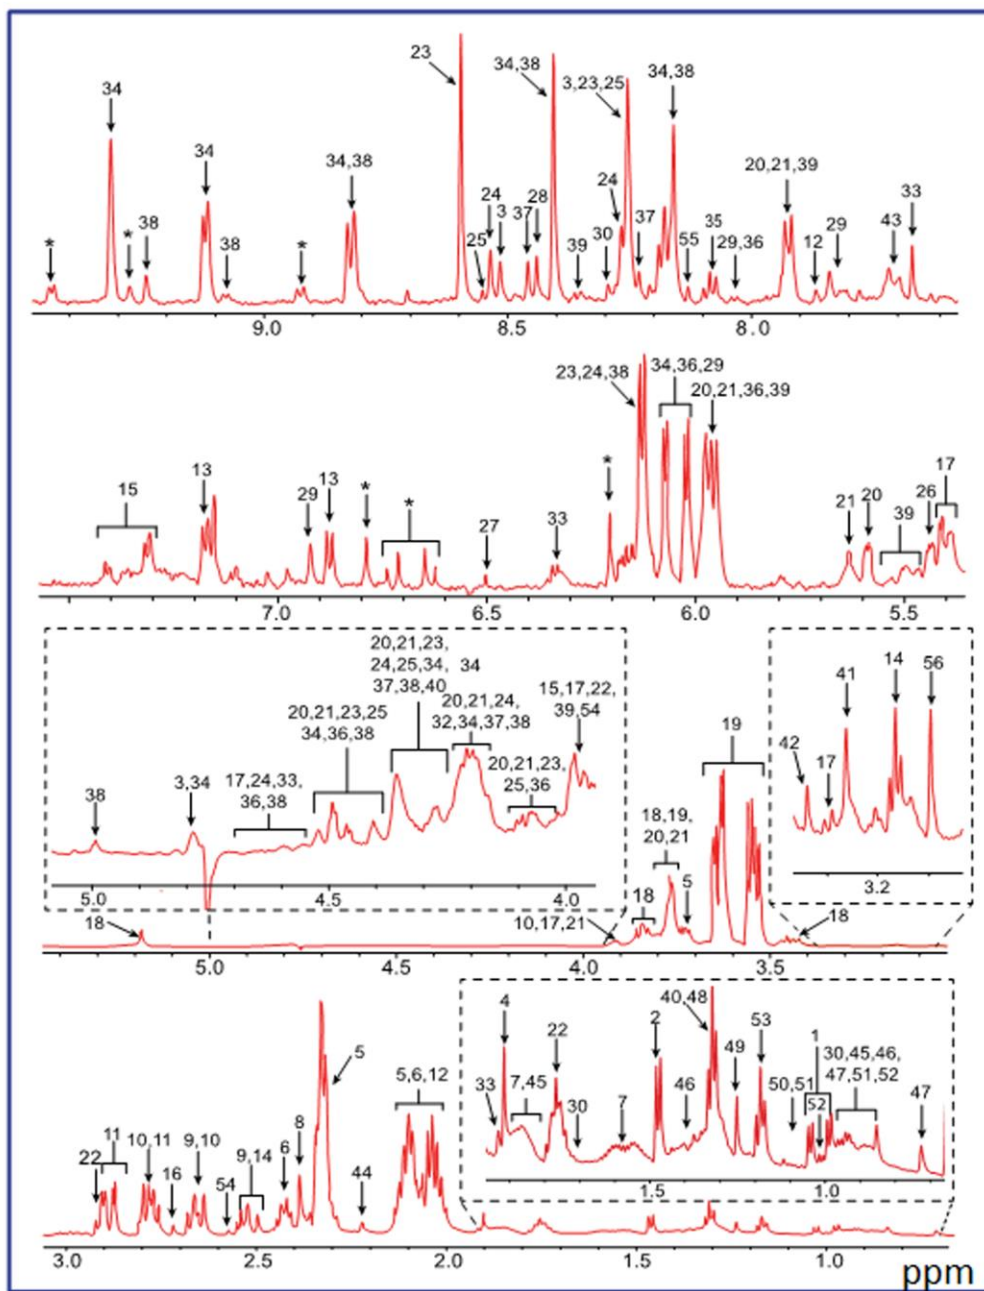

121

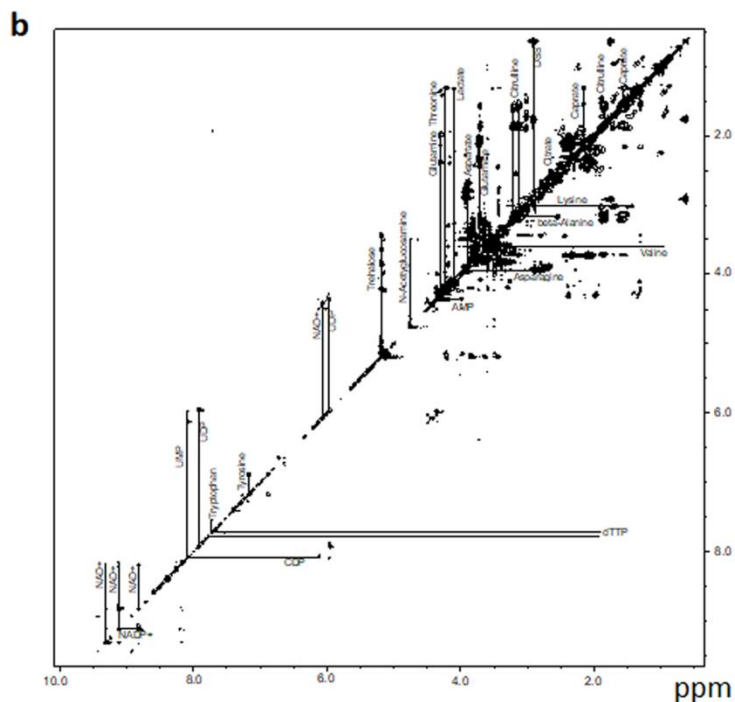

122

123 **Fig S1 a) Representative  $^1\text{H}$  NMR and two-dimensional (2D) spectrum of *M. smegmatis*.**

124 The  $^1\text{H}$  NMR spectrum was obtained for each sample as described. Key: 1, Valine; 2, Alanine;

125 3,ATP; 4, Acetate; 5, Glutamate; 6, Glutamine; 7, Citrulline; 8, Succinate; 9, Citrate; 10,

126 Aspartate; 11, Asparagine; 12, Homoserine; 13, Tyrosine; 14, beta-alanine; 15, Phenylalanine;

127 16, Dimethylamine; 17, Maltose; 18, Trehalose ; 19, Glycerol; 20, UDP-glucose; 21, UDP-

128 galactose; 22, DSS (standard); 23, AMP; 24, ADP; 25, IMP; 26, Glucose-1-phosphate; 27,

129 fumarate ; 28, Formate; 29, CDP; 30, Leucine; 31, Lysine; 32, Fructose 1-6, bisphosphate; 33,

130 dTTP; 34,  $\text{NAD}^+$ ; 35, N-acetyl glucosamine; 36, UMP; 37, NADPH; 38,  $\text{NADP}^+$ ; 39, UDP-N-

131 acetylglucosamine; 40, Threonine; 41, Betaine; 42, Methanol; 43, Tryptophan; 44, Acetone; 45,

132 2-aminobutyrate; 46, Caprate; 47, Cholate; 48, Lactate 49, 3-hydroxyisovalerate; 50, 3-methyl-2-

133 oxovalerate; 51, 2-hydroxy-3-methylvalerate; 52, Isoleucine; 53, Ethanol; 54, Methylamine; 55,

134 GTP; and 56, Malonate. **b)** Representative two-dimensional (2D)  $^1\text{H}$ - $^1\text{H}$  TOCSY NMR spectrum

135 of

*M.*

*smegmatis*.



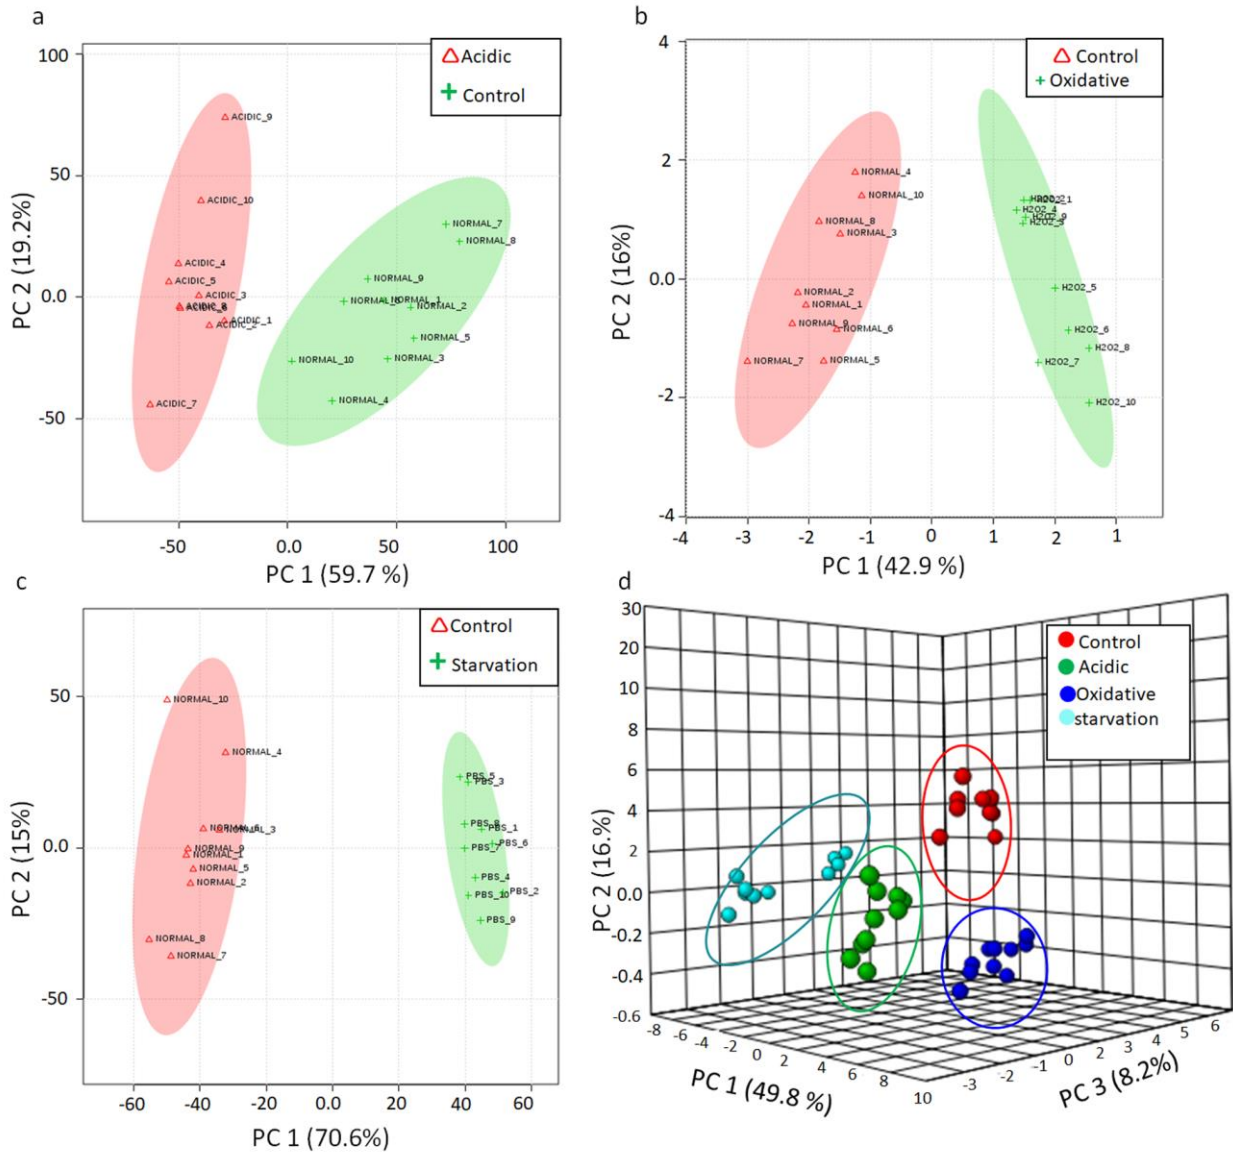

137  
 138 **Fig S2: Principal component analyses (PCA) score plots showing distinctive metabolic**  
 139 **profiles between different stress conditions.** 2D plots of a) acidic stress *versus* control. b)  
 140 oxidative stress *versus* control. c) nutrient starvation *versus* control. d) 3D plot of acidic stress,  
 141 oxidative stress, nutrient starvation, and control, suggesting all groups could be distinctly  
 142 categorized. The shaded area indicated the 95% confidence region. The dots inside the plots  
 143 correspond to biological replicates under each category.

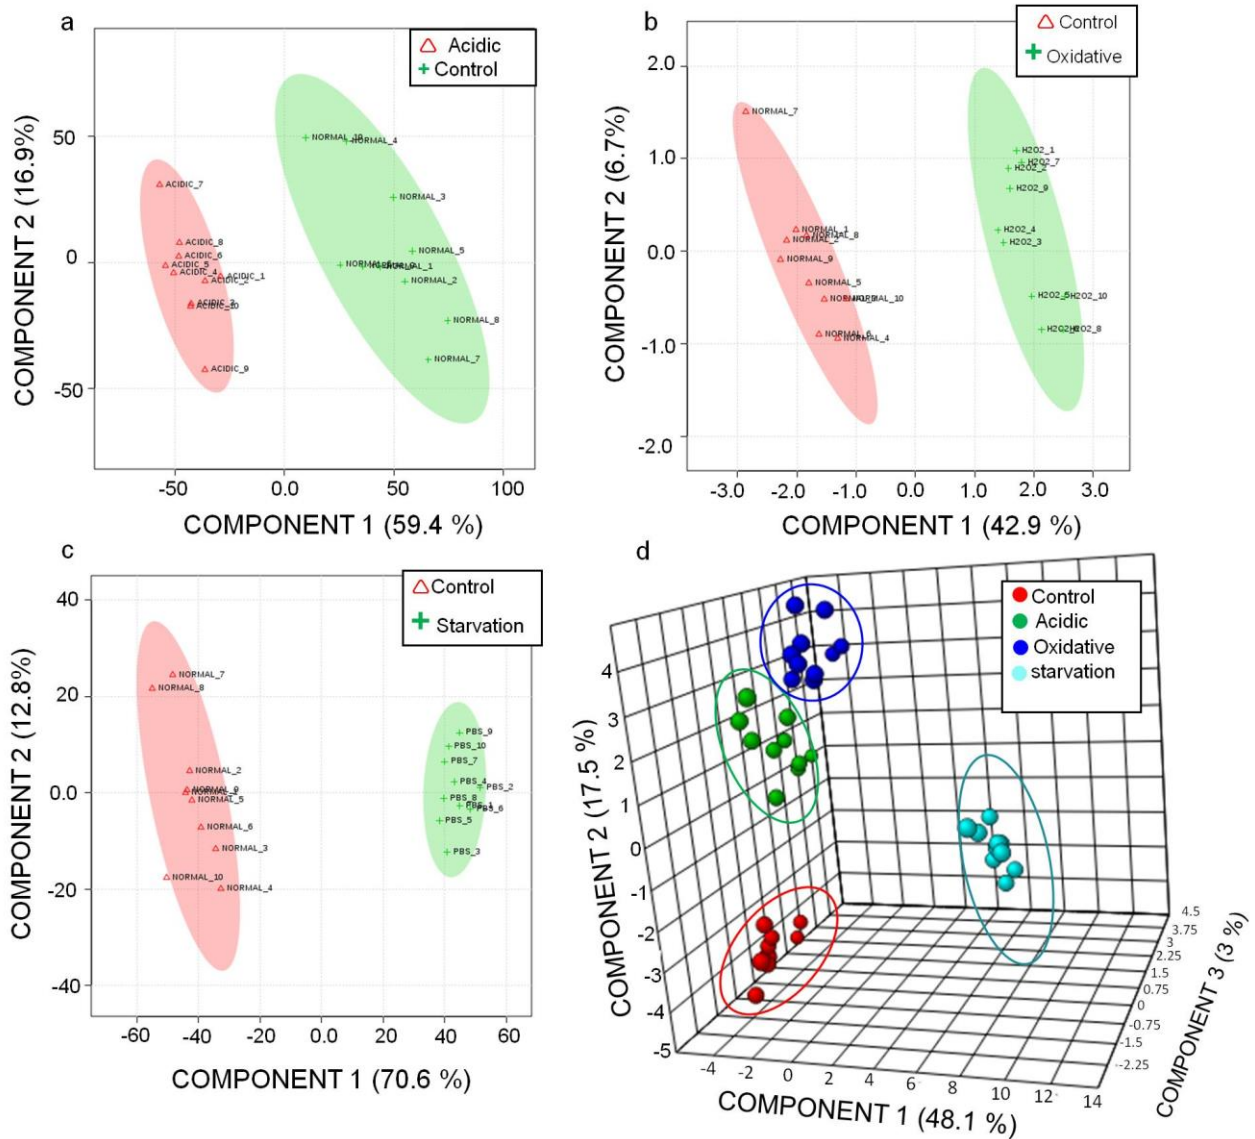

145  
 146 **Fig S3: Partial Least Squares - Discriminant Analysis (PLS-DA) score plots showing**  
 147 **distinctive metabolic profiles between different stress conditions.** 2D plots of a) acidic stress  
 148 *versus* control. b) oxidative stress *versus* control. c) nutrient starvation *versus* control. d) 3D plot  
 149 of acidic stress, oxidative stress, nutrient starvation, and control. The shaded area indicated the  
 150 95% confidence region. The dots inside the plots correspond to biological replicates under each  
 151 category.

153 **Figure S4**

154

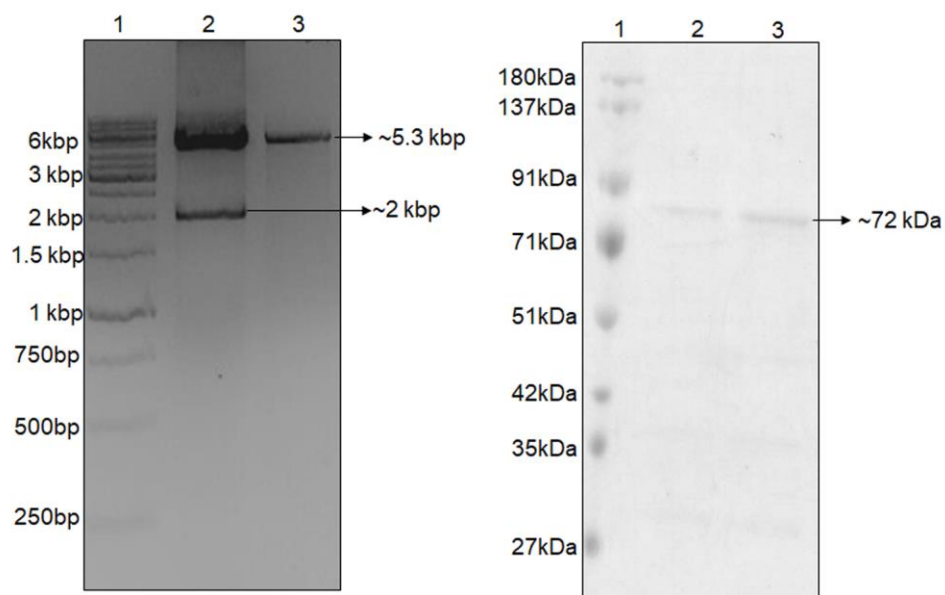

155

156

157 **Fig S4: Cloning and purification of MSMEG\_5124:** (a) 1 % agarose gel showing the clone  
158 confirmation of pET-MS\_5124 plasmid by restriction digestion using BamHI and HindIII. Lane  
159 1: 1kb ladder; lane 2: A fall out of ~2kbp; lane 3: digested pET28a vector. (b) 10 % SDS-PAGE  
160 showing purified protein (MSMEG\_5124) lane 1: Molecular weight marker (in kDa). Lane 2 and  
161 lane 3: purified MSMEG\_5124 with 6X histidine tag (~72.8 kDa).

162

163

164

165

166

167

168

169

170

171

172

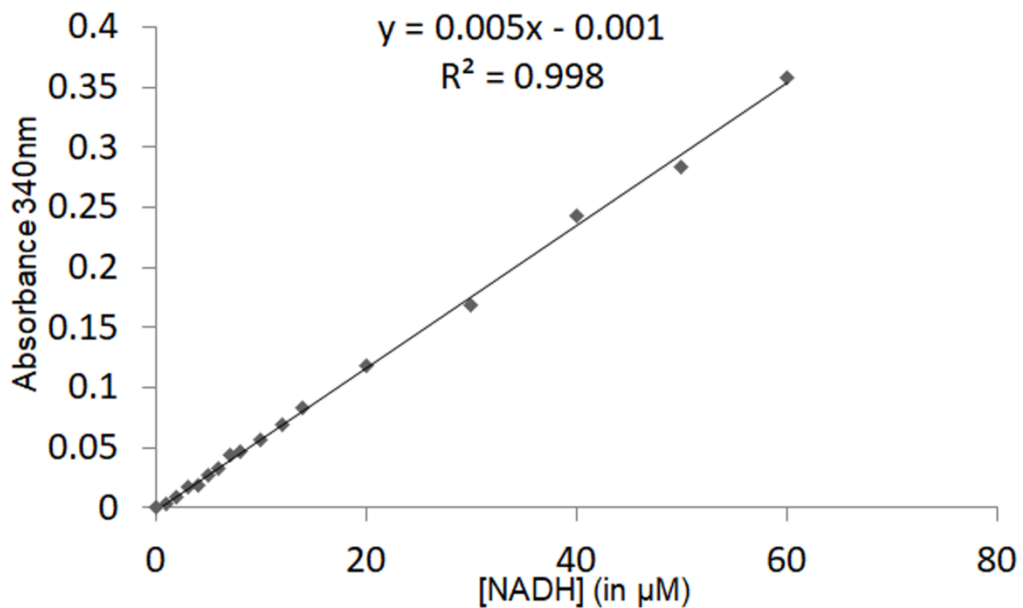

174

175 **Fig S5: The standard plot for NADH quantification:** Concentration of NADP (in  $\mu\text{M}$ ) *versus*  
176 absorbance (at 340nm) plot used as the standard for quantification of NADH produced in the  
177 enzyme assays for MSMEG\_5124.

178 **Table S1:** List of *M. smegmatis* metabolites that were assigned to their respective <sup>1</sup>H chemical  
 179 shifts (ppm) in the <sup>1</sup>H NMR spectrum.

| S.No | Metabolites                          | PPM                                                                                                                                                                                   |
|------|--------------------------------------|---------------------------------------------------------------------------------------------------------------------------------------------------------------------------------------|
| 1    | 2-Aminobutyrate                      | 3.706(t), 1.887(m), 0.968(t)                                                                                                                                                          |
| 2    | 2-Hydroxy-3-methylvalerate<br>(HMVA) | 3.88(d), 1.705(m), 1.351(m), 1.162(m),<br>0.932(d), 0.872(t)                                                                                                                          |
| 3    | 3-Hydroxyisovalerate                 | 1.233(s), 2.35(s)                                                                                                                                                                     |
| 4    | 3-Methyl-2-Oxovalerate               | 0.88(t), 1.086(d), 1.444(m), 1.687(m),<br>2.922(m)                                                                                                                                    |
| 5    | Acetate                              | 1.90(s)                                                                                                                                                                               |
| 6    | Acetone                              | 2.221(s)                                                                                                                                                                              |
| 7    | ADP                                  | 8.534(s), 8.261(s), 6.122(d), 4.52(m), 4.35(m),<br>4.00(m)                                                                                                                            |
| 8    | Alanine                              | 1.46(d), 3.805(q)                                                                                                                                                                     |
| 9    | AMP                                  | 8.596(s), 8.25(s), 6.12(d), 4.49(t), 4.355(m),<br>4.02(m)                                                                                                                             |
| 10   | Asparagine                           | 2.777(dd), 2.89(dd), 3.98(dd)                                                                                                                                                         |
| 11   | Aspartate                            | 2.66(dd), 2.79(dd), 3.916(dd)                                                                                                                                                         |
| 12   | ATP                                  | 8.52(s), 8.25(s), 6.128(d), 4.56(t), 4.41(m),<br>4.23(m), 4.30(m)                                                                                                                     |
| 13   | Beta-alanine                         | 3.16(t), 2.54(t)                                                                                                                                                                      |
| 14   | Betaine                              | 3.263(s), 3.885(s)                                                                                                                                                                    |
| 15   | Caprate                              | 0.839(t), 1.281(m), 1.528(m), 2.519(m)                                                                                                                                                |
| 16   | Cholate                              | 0.711(s), 0.905(s), 0.960(d), 1.00(m), 1.16(m),<br>1.130(m), 1.140(m), 1.491(m), 1.568(m),<br>1.623(m),<br>1.75(m), 1.89(m), 2.01(m), 2.05(m), 2.23(m),<br>3.501(m), 3.39(m), 4.06(m) |
| 17   | Citrate                              | 2.53(d), 2.666(d)                                                                                                                                                                     |
| 18   | Citrulline                           | 1.526(m), 1.59(m), 1.84(m), 1.889(m),                                                                                                                                                 |

|    |                      |                                                                                                                           |
|----|----------------------|---------------------------------------------------------------------------------------------------------------------------|
|    |                      | 3.147(m), 3.126(m),3.74(m)                                                                                                |
| 19 | Dimethylamine        | 2.718(s)                                                                                                                  |
| 20 | DSS (Standard)       | 0.0(s), 0.62(t),1.75(m), 2.91(t)                                                                                          |
| 21 | dTTP                 | 7.68(s), 6.333(m), 4.618(m), 4.22(m), 4.17(m),<br>2.38(m), 1.918(s)                                                       |
| 22 | Ethanol              | 1.185(t), 3.664(q)                                                                                                        |
| 23 | Formate              | 8.44(s)                                                                                                                   |
| 24 | Fumarate             | 6.50(s)                                                                                                                   |
| 25 | Glucose-1-Phosphate  | 5.45(dd), 3.908(m), 3.86(m), 3.76(m),<br>3.487(m), 3.398(t)                                                               |
| 26 | Glutamate            | 2.03(m),2.10(m), 2.34(m), 3.75(dd)                                                                                        |
| 27 | Glutamine            | 2.141(m), 2.459(m), 3.76(t)6                                                                                              |
| 28 | GTP                  | 8.110(s), 6.12(s),5.96(s), 4.54(m),<br>4.35(m)4.24(m)                                                                     |
| 29 | Homoserine           | 2.01(m), 2.16(m), 3.77(m), 3.85(dd)                                                                                       |
| 30 | IMP                  | 8.553(s), 8.231(s), 6.136(d), 4.51(m), 4.36(m),<br>4.01(m)                                                                |
| 31 | isoleucine           | 0.926(t), 0.992(d), 1.248(m), 1.457(m),<br>1.968(m), 3.661(d)                                                             |
| 32 | Lactate              | 4.096(q), 1.313(d)                                                                                                        |
| 33 | Leucine              | 3.721(m), 1.701(m), 0.94(m)                                                                                               |
| 34 | Lysine               | 3.74(t), 3.02(t), 1.89(m), 1.71(m), 1.46(m)                                                                               |
| 35 | Malonate             | 3.09(s)                                                                                                                   |
| 36 | Maltose              | 5.41(d), 5.39(d), 5.211(d), 3.96(m), 3.93(m),<br>3.84(m), 3.76(m), 3.70(m), 3.66(m),3.62(m),<br>3.58(m), 3.421(m),3.27(m) |
| 37 | Methylamine          | 2.573(s)                                                                                                                  |
| 38 | N-Acetyl-glucosamine |                                                                                                                           |
| 39 | NAD                  | 9.314(s), 9.121(d), 8.824(d), 8.406(s),<br>8.184(m), 8.154(s), 6.07(d), 6.021(d),                                         |

|    |                         |                                                                                                 |
|----|-------------------------|-------------------------------------------------------------------------------------------------|
|    |                         | 4.522(m),                                                                                       |
| 40 | NADP+                   | 9.281(s), 9.08(d), 8.80(d), 8.41(s), 8.18(m),<br>8.13(s), 6.112(d), 6.022(d), 4.99(q), 4.60(t), |
| 41 | Phenyl alanine          | 7.42(m), 7.36(m), 7.32(m), 3.98(dd), 3.27(m),<br>3.13(m)                                        |
| 42 | Succinate               | 2.385(s)                                                                                        |
| 43 | Threonine               | 4.244(m), 3.582(d), 1.313(d)                                                                    |
| 44 | Trehalose               | 5.18(d), 3.84(m), 3.80(m), 3.76(m),<br>3.64(dd),3.43(t)                                         |
| 45 | Tryptophan              | 7.72(d), 7.53(d), 7.32(s), 7.24(m), 7.19(m),<br>4.04(dd), 3.47(dd), 3.29(dd)                    |
| 46 | Tyrosine                | 7.17(d), 6.87(d), 3.93(dd), 3.18(dd),3.04(dd)                                                   |
| 47 | UDP Galactose           | 7.93(d), 5.97(m), 5.63(dd), 4.36(m), 4.25(m),<br>4.15(m),4.02(d), 3.90(dd), 3.805(dt), 3.75(m)  |
| 48 | UDP-Glucose             | 7.925(d), 5.977(m), 5.593(dd), 4.36(m),<br>4.27(m), 4.24(m), 4.189(m), 3.877(m),<br>3.77(m),    |
| 49 | UDP-N-Acetylglucosamine | 8.177(d), 8.077(m), 5.19(d), 4.70(d), 3.904(m),<br>3.841(m), 3.784(m), 3.74(m),                 |
| 50 | UMP                     | 8.07(d), 5.98(m), 4.41(t), 4.34(t), 4.26(m),<br>3.97(m)                                         |
| 51 | Valine                  | 0.996(d), 1.047(d), 2.281(m),3.617(d)                                                           |

180

181

182 **Table S2:** Fold change and VIP score of a) acidic stress *versus* control. b) oxidative stress  
 183 *versus* control. c) nutrient starvation *versus* control. d) Analysis of variance (ANOVA) table  
 184 showing significantly ( $p < 0.05$ ) changed metabolites in comparison to acidic stress, oxidative  
 185 stress, and nutrient starvation groups and control.

186 a) Fold changes and VIP scores of **acidic stress** *versus* **control**.

| S.No | Metabolites                                        | Fc          | p.value         | FDR             | VIP score   |
|------|----------------------------------------------------|-------------|-----------------|-----------------|-------------|
| 1    | <b>D-Maltose</b>                                   | <b>3.08</b> | <b>1.00E-09</b> | <b>1.30E-08</b> | 0.65        |
| 2    | <b>Capric acid</b>                                 | <b>2.17</b> | <b>7.50E-05</b> | <b>2.00E-04</b> | 0.47        |
| 3    | <b>Taurine</b>                                     | <b>1.77</b> | <b>3.60E-05</b> | <b>1.00E-04</b> | 0.62        |
| 4    | <b>Methylamine</b>                                 | <b>1.59</b> | <b>1.30E-01</b> | <b>1.60E-01</b> | 0.22        |
| 5    | <b>2-Hydroxy-3-</b><br><b>methylpentanoic acid</b> | <b>1.46</b> | <b>3.30E-03</b> | <b>6.40E-03</b> | 0.25        |
| 6    | <b>Dimethylamine</b>                               | <b>1.45</b> | <b>1.20E-01</b> | <b>1.40E-01</b> | 0.25        |
| 7    | <b>Malonic acid</b>                                | <b>1.34</b> | <b>1.50E-02</b> | <b>2.50E-02</b> | 0.73        |
| 8    | <b>3-Methyl-2-oxovaleric acid</b>                  | <b>1.34</b> | <b>1.30E-02</b> | <b>2.20E-02</b> | 0.09        |
| 9    | <b>Citric acid</b>                                 | <b>1.29</b> | <b>2.30E-01</b> | <b>2.60E-01</b> | 0.63        |
| 10   | <b>L-Asparagine</b>                                | <b>1.28</b> | <b>1.80E-02</b> | <b>3.00E-02</b> | <b>1.78</b> |
| 11   | Uridinediphosphate glucose                         | 1.11        | 3.40E-01        | 3.70E-01        | 0.11        |
| 12   | 3-Hydroxyisovaleric acid                           | 1           | 9.80E-01        | 1.00E+00        | 0           |
| 13   | L-Lactic acid                                      | 1           | 1.00E+00        | 1.00E+00        | 0           |
| 14   | Betaine                                            | 0.96        | 6.30E-01        | 6.90E-01        | 0.04        |
| 15   | NADP                                               | 0.92        | 6.60E-01        | 7.00E-01        | 0.03        |
| 16   | ADP                                                | 0.84        | 8.90E-02        | 1.20E-01        | 0.15        |
| 17   | NAD                                                | 0.83        | 2.00E-02        | 3.20E-02        | 0.39        |
| 18   | Nicotinamide N-oxide                               | 0.83        | 8.50E-02        | 1.20E-01        | 0.13        |
| 19   | Acetone                                            | 0.83        | 1.90E-05        | 6.30E-05        | 0.25        |
| 20   | Trehalose                                          | 0.82        | 1.70E-01        | 2.00E-01        | <b>1.15</b> |
| 21   | Citrulline                                         | 0.8         | 1.00E-01        | 1.30E-01        | 0.42        |
| 22   | Uridinediphosphate-N-<br>acetylglucosamine         | 0.8         | 3.00E-02        | 4.60E-02        | 0.13        |



|    |                                    |             |                 |                 |             |
|----|------------------------------------|-------------|-----------------|-----------------|-------------|
| 23 | Formic acid                        | 0.78        | 1.00E-03        | 2.20E-03        | 0.28        |
| 24 | Acetic acid                        | 0.74        | 4.30E-02        | 6.10E-02        | 0.41        |
| 25 | Adenosine monophosphate            | 0.72        | 6.00E-04        | 1.40E-03        | 0.55        |
| 26 | Sucrose                            | 0.7         | 1.40E-01        | 1.70E-01        | 0.17        |
| 27 | Adenosine triphosphate             | 0.7         | 9.90E-02        | 1.30E-01        | 0.2         |
| 28 | Inosinic acid                      | 0.7         | 9.10E-03        | 1.60E-02        | 0.12        |
| 29 | L-Lysine                           | 0.67        | 1.30E-03        | 2.70E-03        | 0.29        |
| 30 | L-Leucine                          | 0.66        | 1.70E-03        | 3.50E-03        | 0.28        |
| 31 | <b>Uridinediphosphategalactose</b> | <b>0.66</b> | <b>2.50E-05</b> | <b>7.70E-05</b> | 0.2         |
| 32 | <b>L-Phenylalanine</b>             | <b>0.65</b> | <b>9.10E-11</b> | <b>1.50E-09</b> | 0.21        |
| 33 | <b>Glucose 1-phosphate</b>         | <b>0.62</b> | <b>4.00E-02</b> | <b>5.80E-02</b> | 0.25        |
| 34 | <b>Uridine 5'-monophosphate</b>    | <b>0.61</b> | <b>1.10E-04</b> | <b>2.80E-04</b> | 0.3         |
| 35 | <b>Succinic acid</b>               | <b>0.6</b>  | <b>9.50E-06</b> | <b>3.40E-05</b> | 0.85        |
| 36 | <b>Cholic acid</b>                 | <b>0.6</b>  | <b>3.90E-03</b> | <b>7.20E-03</b> | 0.27        |
| 37 | <b>Thymidine 5'-triphosphate</b>   | <b>0.59</b> | <b>8.70E-06</b> | <b>3.40E-05</b> | 0.28        |
| 38 | <b>L-Glutamine</b>                 | <b>0.59</b> | <b>2.30E-06</b> | <b>1.00E-05</b> | <b>1.73</b> |
| 39 | <b>L-Alpha-aminobutyric acid</b>   | <b>0.57</b> | <b>6.00E-04</b> | <b>1.40E-03</b> | 0.31        |
| 40 | <b>L-Aspartic acid</b>             | <b>0.56</b> | <b>7.00E-05</b> | <b>2.00E-04</b> | <b>1.73</b> |
| 41 | <b>D-Glutamic acid</b>             | <b>0.55</b> | <b>1.20E-08</b> | <b>9.00E-08</b> | <b>4.71</b> |
| 42 | <b>L-Homoserine</b>                | <b>0.49</b> | <b>1.30E-08</b> | <b>9.00E-08</b> | <b>2.61</b> |
| 43 | <b>Isoleucine</b>                  | <b>0.37</b> | <b>3.90E-08</b> | <b>2.40E-07</b> | 0.32        |
| 44 | <b>1-Methylnicotinamide</b>        | <b>0.33</b> | <b>8.20E-08</b> | <b>4.50E-07</b> | 0.42        |
| 45 | <b>Beta-Alanine</b>                | <b>0.31</b> | <b>2.20E-06</b> | <b>1.00E-05</b> | <b>1.34</b> |
| 46 | <b>L-Threonine</b>                 | <b>0.31</b> | <b>4.50E-06</b> | <b>1.90E-05</b> | <b>1.25</b> |
| 47 | <b>L-Valine</b>                    | <b>0.3</b>  | <b>4.40E-09</b> | <b>4.40E-08</b> | 0.77        |
| 48 | <b>L-Tyrosine</b>                  | <b>0.28</b> | <b>7.60E-11</b> | <b>1.50E-09</b> | 0.54        |
| 49 | <b>Alanine</b>                     | <b>0.26</b> | <b>5.70E-11</b> | <b>1.50E-09</b> | <b>1.19</b> |

187

188 Fc: fold change; VIP score: variable of importance score obtained from PLS-DA plot, p-value: p  
189 values obtained after performing a t-test, FDR: value obtained after performing false discovery  
190 test. Note: - Metabolite (in bold) indicate statistically differential metabolite. Metabolites with

191 VIP score  $>1$  were considered to be contributing to the model significantly.

192 **b) Fold changes and VIP scores of oxidative stress versus control**

| S.no | Metabolites                                   | Fc          | p.value         | FDR             | VIP score   |
|------|-----------------------------------------------|-------------|-----------------|-----------------|-------------|
| 1    | <b>L-Lysine</b>                               | <b>3.33</b> | <b>1.80E-07</b> | <b>1.10E-06</b> | <b>1.96</b> |
| 2    | <b>Methylamine</b>                            | <b>2.85</b> | <b>1.90E-05</b> | <b>6.60E-05</b> | <b>1.57</b> |
| 3    | <b>Uridinediphosphate-N-acetylglucosamine</b> | <b>2.36</b> | <b>3.50E-07</b> | <b>1.80E-06</b> | <b>1.4</b>  |
| 4    | <b>Betaine</b>                                | <b>2.36</b> | <b>3.20E-09</b> | <b>8.10E-08</b> | <b>1.7</b>  |
| 5    | <b>L-Aspartic acid</b>                        | <b>2.2</b>  | <b>1.30E-07</b> | <b>9.00E-07</b> | <b>2.69</b> |
| 6    | <b>Capric acid</b>                            | <b>2.1</b>  | <b>8.00E-06</b> | <b>3.10E-05</b> | <b>1.4</b>  |
| 7    | <b>D-Maltose</b>                              | <b>2.08</b> | <b>2.50E-08</b> | <b>4.20E-07</b> | <b>1.37</b> |
| 8    | <b>2-Hydroxy-3-methylpentanoic acid</b>       | <b>1.9</b>  | <b>4.50E-05</b> | <b>1.50E-04</b> | <b>1.22</b> |
| 9    | <b>3-Methyl-2-oxovaleric acid</b>             | <b>1.83</b> | <b>2.30E-07</b> | <b>1.30E-06</b> | 0.94        |
| 10   | <b>Isoleucine</b>                             | <b>1.5</b>  | <b>1.20E-03</b> | <b>3.60E-03</b> | 0.83        |
| 11   | <b>Acetic acid</b>                            | <b>1.43</b> | <b>7.30E-02</b> | <b>1.40E-01</b> | 0.8         |
| 12   | <b>Dimethylamine</b>                          | <b>1.43</b> | <b>2.40E-03</b> | <b>6.60E-03</b> | 0.89        |
| 13   | <b>Taurine</b>                                | <b>1.36</b> | <b>3.50E-02</b> | <b>8.10E-02</b> | 0.71        |
| 14   | L-Lactic acid                                 | 1.22        | 9.70E-02        | 1.60E-01        | 0.59        |
| 15   | L-Glutamine                                   | 1.17        | 3.40E-03        | 9.00E-03        | 0.94        |
| 16   | 3-Hydroxyisovaleric acid                      | 1.13        | 1.40E-01        | 2.20E-01        | 0.34        |
| 17   | Uridinediphosphate glucose                    | 1.13        | 8.50E-02        | 1.50E-01        | 0.41        |
| 18   | Acetone                                       | 1.11        | 2.00E-01        | 2.90E-01        | 0.3         |
| 19   | L-Leucine                                     | 1.1         | 3.60E-01        | 4.70E-01        | 0.25        |
| 20   | L-Asparagine                                  | 1.1         | 1.70E-01        | 2.60E-01        | 0.61        |
| 21   | Formic acid                                   | 1.1         | 2.20E-01        | 3.20E-01        | 0.3         |
| 22   | L-Homoserine                                  | 1.09        | 2.90E-01        | 4.00E-01        | 0.48        |
| 23   | Thymidine 5'-triphosphate                     | 1.09        | 6.70E-01        | 7.00E-01        | 0.12        |
| 24   | Citric acid                                   | 1.08        | 5.40E-01        | 6.20E-01        | 0.3         |
| 25   | Citrulline                                    | 1.04        | 6.50E-01        | 6.90E-01        | 0.16        |
| 26   | L-Phenylalanine                               | 1.03        | 5.70E-01        | 6.40E-01        | 0.1         |

|    |                                |             |                 |                 |             |
|----|--------------------------------|-------------|-----------------|-----------------|-------------|
| 27 | L-Threonine                    | 0.99        | 9.80E-01        | 9.80E-01        | 0.01        |
| 28 | Beta-Alanine                   | 0.98        | 8.10E-01        | 8.30E-01        | 0.09        |
| 29 | Succinic acid                  | 0.95        | 4.90E-01        | 5.80E-01        | 0.24        |
| 30 | Trehalose                      | 0.93        | 6.30E-01        | 6.90E-01        | 0.28        |
| 31 | Cholic acid                    | 0.92        | 4.00E-01        | 4.90E-01        | 0.21        |
| 32 | Alanine                        | 0.91        | 9.40E-02        | 1.60E-01        | 0.42        |
| 33 | L-Valine                       | 0.91        | 3.40E-01        | 4.40E-01        | 0.3         |
| 34 | Uridinediphosphategalactose    | 0.9         | 1.20E-01        | 1.90E-01        | 0.3         |
| 35 | L-Alpha-aminobutyric acid      | 0.89        | 4.10E-01        | 5.10E-01        | 0.24        |
| 36 | L-Tyrosine                     | 0.89        | 6.30E-02        | 1.30E-01        | 0.41        |
| 37 | ADP                            | 0.83        | 4.10E-02        | 8.90E-02        | 0.52        |
| 38 | Uridine 5'-monophosphate       | 0.82        | 5.40E-02        | 1.10E-01        | 0.51        |
| 39 | Sucrose                        | 0.8         | 3.00E-01        | 4.00E-01        | 0.34        |
| 40 | Glucose 1-phosphate            | 0.76        | 7.40E-02        | 1.40E-01        | 0.56        |
| 41 | <b>D-Glutamic acid</b>         | <b>0.71</b> | <b>8.90E-08</b> | <b>7.40E-07</b> | <b>2.16</b> |
| 42 | <b>Inosinic acid</b>           | <b>0.7</b>  | <b>1.60E-02</b> | <b>3.90E-02</b> | 0.6         |
| 43 | <b>Malonic acid</b>            | <b>0.69</b> | <b>1.30E-02</b> | <b>3.10E-02</b> | <b>1.08</b> |
| 44 | <b>Nicotinamide N-oxide</b>    | <b>0.67</b> | <b>7.80E-05</b> | <b>2.40E-04</b> | 0.9         |
| 45 | <b>NAD</b>                     | <b>0.59</b> | <b>1.70E-06</b> | <b>7.50E-06</b> | <b>1.47</b> |
| 46 | <b>Adenosine monophosphate</b> | <b>0.52</b> | <b>6.40E-08</b> | <b>6.60E-07</b> | <b>1.62</b> |
| 47 | <b>Adenosine triphosphate</b>  | <b>0.44</b> | <b>4.60E-06</b> | <b>1.90E-05</b> | <b>1.35</b> |
| 48 | <b>1-Methylnicotinamide</b>    | <b>0.42</b> | <b>6.60E-08</b> | <b>6.60E-07</b> | <b>1.4</b>  |
| 49 | <b>NADP</b>                    | <b>0.13</b> | <b>2.10E-12</b> | <b>1.10E-10</b> | <b>1.7</b>  |

193

194 Fc: fold change; VIP score: variable of importance score obtained from PLS-DA plot, p-value: p  
195 values obtained after performing a t-test, FDR: value obtained after performing false discovery  
196 test. Note: - Metabolite (in bold) indicate statistically differential metabolite. Metabolites with  
197 VIP score >1 were considered to be contributing to the model significantly.

198 c) Fold changes and VIP scores of **nutrient starvation** versus control.

| S.no | Metabolites                             | Fc           | p.value         | FDR             | VIP score   |
|------|-----------------------------------------|--------------|-----------------|-----------------|-------------|
| 1    | <b>2-Hydroxy-3-methylpentanoic acid</b> | <b>10.45</b> | <b>2.80E-07</b> | <b>5.30E-07</b> | <b>1.05</b> |
| 2    | <b>L-Leucine</b>                        | <b>4.91</b>  | <b>1.80E-05</b> | <b>2.70E-05</b> | 0.84        |
| 3    | <b>Capric acid</b>                      | <b>3.88</b>  | <b>8.10E-08</b> | <b>2.00E-07</b> | 0.62        |
| 4    | <b>Taurine</b>                          | <b>3.88</b>  | <b>1.90E-10</b> | <b>8.80E-10</b> | <b>1.04</b> |
| 5    | <b>Methylamine</b>                      | <b>3.45</b>  | <b>2.10E-03</b> | <b>2.60E-03</b> | 0.48        |
| 6    | <b>L-Lysine</b>                         | <b>2.88</b>  | <b>1.20E-07</b> | <b>2.70E-07</b> | 0.62        |
| 7    | <b>L-Tyrosine</b>                       | <b>2.83</b>  | <b>1.90E-08</b> | <b>5.30E-08</b> | 0.66        |
| 8    | <b>Malonic acid</b>                     | <b>2.68</b>  | <b>7.70E-08</b> | <b>2.00E-07</b> | <b>1.65</b> |
| 9    | <b>Acetone</b>                          | <b>1.93</b>  | <b>7.50E-12</b> | <b>4.20E-11</b> | 0.5         |
| 10   | <b>3-Hydroxyisovaleric acid</b>         | <b>1.87</b>  | <b>4.30E-16</b> | <b>2.10E-14</b> | 0.4         |
| 11   | <b>3-Methyl-2-oxovaleric acid</b>       | <b>1.83</b>  | <b>3.50E-04</b> | <b>4.80E-04</b> | 0.13        |
| 12   | <b>Betaine</b>                          | <b>1.75</b>  | <b>7.40E-06</b> | <b>1.20E-05</b> | 0.4         |
| 13   | <b>Acetic acid</b>                      | <b>1.43</b>  | <b>5.50E-03</b> | <b>6.30E-03</b> | 0.48        |
| 14   | <b>Formic acid</b>                      | <b>1.38</b>  | <b>4.80E-04</b> | <b>6.30E-04</b> | 0.29        |
| 15   | Dimethylamine                           | 1.31         | 4.40E-01        | 4.50E-01        | 0.12        |
| 16   | <b>L-Lactic acid</b>                    | <b>1.3</b>   | <b>4.60E-02</b> | <b>4.90E-02</b> | 0.32        |
| 17   | <b>Citrulline</b>                       | <b>1.28</b>  | <b>4.40E-02</b> | <b>4.70E-02</b> | 0.43        |
| 18   | D-Glutamic acid                         | 1.22         | 5.00E-04        | 6.40E-04        | <b>2.27</b> |
| 19   | L-Alpha-aminobutyric acid               | 1            | 1.00E+00        | 1.00E+00        | 0.0001      |
| 20   | <b>L-Homoserine</b>                     | <b>0.79</b>  | <b>4.60E-03</b> | <b>5.40E-03</b> | <b>1.06</b> |
| 21   | Cholic acid                             | 0.73         | 1.50E-01        | 1.50E-01        | 0.13        |
| 22   | <b>L-Valine</b>                         | <b>0.7</b>   | <b>2.60E-02</b> | <b>2.90E-02</b> | 0.29        |
| 23   | <b>L-Threonine</b>                      | <b>0.63</b>  | <b>4.90E-03</b> | <b>5.70E-03</b> | 0.61        |
| 24   | <b>Nicotinamide N-oxide</b>             | <b>0.57</b>  | <b>2.90E-04</b> | <b>4.10E-04</b> | 0.23        |
| 25   | <b>Trehalose</b>                        | <b>0.56</b>  | <b>2.00E-03</b> | <b>2.40E-03</b> | <b>2.02</b> |
| 26   | <b>NAD</b>                              | <b>0.5</b>   | <b>2.60E-07</b> | <b>5.30E-07</b> | 0.7         |

|    |                                               |               |                 |                 |             |
|----|-----------------------------------------------|---------------|-----------------|-----------------|-------------|
| 27 | <b>ADP</b>                                    | <b>0.46</b>   | <b>4.20E-06</b> | <b>7.20E-06</b> | 0.31        |
| 28 | <b>Uridinediphosphate glucose</b>             | <b>0.45</b>   | <b>7.00E-07</b> | <b>1.30E-06</b> | 0.4         |
| 29 | <b>Inosinic acid</b>                          | <b>0.43</b>   | <b>7.70E-06</b> | <b>1.20E-05</b> | 0.15        |
| 30 | <b>Isoleucine</b>                             | <b>0.41</b>   | <b>1.50E-05</b> | <b>2.30E-05</b> | 0.23        |
| 31 | <b>Alanine</b>                                | <b>0.4</b>    | <b>7.80E-09</b> | <b>2.30E-08</b> | 0.83        |
| 32 | <b>Succinic acid</b>                          | <b>0.35</b>   | <b>2.40E-07</b> | <b>5.10E-07</b> | 0.88        |
| 33 | <b>Adenosine triphosphate</b>                 | <b>0.33</b>   | <b>1.50E-05</b> | <b>2.30E-05</b> | 0.35        |
| 34 | <b>L-Phenylalanine</b>                        | <b>0.3</b>    | <b>4.10E-15</b> | <b>1.00E-13</b> | 0.24        |
| 35 | <b>L-Glutamine</b>                            | <b>0.28</b>   | <b>5.30E-09</b> | <b>1.70E-08</b> | <b>1.87</b> |
| 36 | <b>Uridine 5'-monophosphate</b>               | <b>0.21</b>   | <b>1.50E-09</b> | <b>5.80E-09</b> | 0.38        |
| 37 | <b>L-Aspartic acid</b>                        | <b>0.18</b>   | <b>1.90E-09</b> | <b>6.90E-09</b> | <b>2.06</b> |
| 38 | <b>NADP</b>                                   | <b>0.11</b>   | <b>1.00E-07</b> | <b>2.40E-07</b> | 0.23        |
| 39 | <b>Uridinediphosphategalactose</b>            | <b>0.08</b>   | <b>8.90E-14</b> | <b>8.90E-13</b> | 0.29        |
| 40 | <b>Adenosine monophosphate</b>                | <b>0.08</b>   | <b>6.40E-13</b> | <b>4.60E-12</b> | 0.93        |
| 41 | <b>Uridinediphosphate-N-acetylglucosamine</b> | <b>0.08</b>   | <b>4.30E-10</b> | <b>1.80E-09</b> | 0.29        |
| 42 | <b>D-Maltose</b>                              | <b>0.06</b>   | <b>2.40E-14</b> | <b>4.00E-13</b> | 0.35        |
| 43 | <b>Thymidine 5'-triphosphate</b>              | <b>0.05</b>   | <b>7.80E-13</b> | <b>4.80E-12</b> | 0.37        |
| 44 | <b>Sucrose</b>                                | <b>0.04</b>   | <b>7.20E-05</b> | <b>1.00E-04</b> | 0.36        |
| 45 | <b>1-Methylnicotinamide</b>                   | <b>0.04</b>   | <b>1.10E-10</b> | <b>5.60E-10</b> | 0.4         |
| 46 | <b>Glucose 1-phosphate</b>                    | <b>0.04</b>   | <b>3.80E-06</b> | <b>6.70E-06</b> | 0.41        |
| 47 | <b>Beta-Alanine</b>                           | <b>0.004</b>  | <b>3.50E-09</b> | <b>1.20E-08</b> | <b>1.32</b> |
| 48 | <b>Citric acid</b>                            | <b>0.0024</b> | <b>1.40E-07</b> | <b>3.10E-07</b> | <b>1.65</b> |
| 49 | <b>L-Asparagine</b>                           | <b>0.0006</b> | <b>4.00E-14</b> | <b>5.00E-13</b> | <b>3.6</b>  |

199

200 Fc: fold change; VIP score: variable of importance score obtained from PLS-DA plot, p-value: p  
201 values obtained after performing a t-test, FDR: value obtained after performing false discovery  
202 test. Note: - Metabolite (in bold) indicate statistically differential metabolite. Metabolites with  
203 VIP score >1 were considered to be contributing to the model significantly.

204 **d) Analysis of variance (ANOVA) table** showing significantly ( $p < 0.05$ ) changed metabolites  
 205 in comparison to acidic stress, oxidative stress, and nutrient starvation groups and control.

| Metabolites                            | F.value | p.value | FDR     | VIP Score   |
|----------------------------------------|---------|---------|---------|-------------|
| D-Glutamic acid                        | 362.5   | 6.1E-27 | 3.1E-25 | <b>1.16</b> |
| Adenosine monophosphate                | 229.2   | 1.7E-23 | 4.2E-22 | <b>1.52</b> |
| L-Asparagine                           | 222.5   | 2.8E-23 | 4.6E-22 | <b>1.49</b> |
| Taurine                                | 134.8   | 1.3E-19 | 1.6E-18 | 0.93        |
| Uridinediphosphategalactose            | 127.5   | 3.1E-19 | 2.8E-18 | <b>1.21</b> |
| Alanine                                | 127.0   | 3.3E-19 | 2.8E-18 | 0.23        |
| 1-Methylnicotinamide                   | 119.5   | 9.0E-19 | 5.7E-18 | 0.93        |
| L-Aspartic acid                        | 118.7   | 1.0E-18 | 5.7E-18 | 0.08        |
| Acetone                                | 118.6   | 1.0E-18 | 5.7E-18 | <b>1.21</b> |
| Malonic acid                           | 114.4   | 1.8E-18 | 9.1E-18 | 0.74        |
| L-Tyrosine                             | 112.4   | 2.4E-18 | 1.1E-17 | <b>1.35</b> |
| D-Maltose                              | 106.3   | 6.0E-18 | 2.5E-17 | <b>1.30</b> |
| 3-Hydroxyisovaleric acid               | 96.4    | 2.9E-17 | 1.0E-16 | <b>1.04</b> |
| L-Glutamine                            | 93.5    | 4.7E-17 | 1.6E-16 | 0.68        |
| 2-Hydroxy-3-methylpentanoic acid       | 83.6    | 2.7E-16 | 8.3E-16 | <b>1.20</b> |
| Uridinediphosphate-N-acetylglucosamine | 83.5    | 2.8E-16 | 8.3E-16 | 0.34        |
| Beta-Alanine                           | 78.8    | 6.9E-16 | 1.9E-15 | 0.54        |
| Capric acid                            | 61.2    | 3.3E-14 | 8.7E-14 | 0.85        |
| NAD                                    | 57.2    | 8.9E-14 | 2.2E-13 | <b>1.39</b> |
| L-Phenylalanine                        | 55.1    | 1.6E-13 | 3.7E-13 | 0.95        |
| NADP                                   | 49.9    | 6.7E-13 | 1.5E-12 | <b>1.39</b> |
| Betaine                                | 45.3    | 2.6E-12 | 5.7E-12 | <b>1.17</b> |
| L-Leucine                              | 42.4    | 6.7E-12 | 1.4E-11 | <b>1.17</b> |
| Thymidine 5'-triphosphate              | 40.9    | 1.1E-11 | 2.2E-11 | 0.81        |

|                            |      |         |         |             |
|----------------------------|------|---------|---------|-------------|
| L-Lysine                   | 40.7 | 1.2E-11 | 2.3E-11 | <b>1.35</b> |
| Citric acid                | 38.4 | 2.6E-11 | 4.8E-11 | <b>1.34</b> |
| Uridine 5'-monophosphate   | 36.7 | 4.7E-11 | 8.5E-11 | <b>1.09</b> |
| Isoleucine                 | 35.2 | 8.5E-11 | 1.5E-10 | 0.19        |
| Uridinediphosphate glucose | 31.5 | 3.5E-10 | 5.9E-10 | <b>1.27</b> |
| Glucose 1-phosphate        | 24.4 | 8.5E-09 | 1.4E-08 | <b>1.07</b> |
| Formic acid                | 24.2 | 9.7E-09 | 1.5E-08 | <b>1.08</b> |
| Succinic acid              | 23.4 | 1.4E-08 | 2.1E-08 | 0.83        |
| Sucrose                    | 23.3 | 1.5E-08 | 2.2E-08 | <b>1.18</b> |
| Citrulline                 | 20.9 | 5.2E-08 | 7.5E-08 | 0.96        |
| ADP                        | 20.1 | 8.1E-08 | 1.1E-07 | <b>1.30</b> |
| L-Threonine                | 19.6 | 1.1E-07 | 1.5E-07 | 0.69        |
| 3-Methyl-2-oxovaleric acid | 18.1 | 2.5E-07 | 3.3E-07 | 0.75        |
| L-Homoserine               | 15.2 | 1.5E-06 | 2.0E-06 | 0.94        |
| Adenosine triphosphate     | 13.4 | 4.9E-06 | 6.1E-06 | <b>1.04</b> |
| L-Valine                   | 13.4 | 5.2E-06 | 6.3E-06 | 0.76        |
| Inosinic acid              | 9.9  | 6.6E-05 | 7.8E-05 | <b>1.01</b> |
| Acetic acid                | 9.0  | 1.4E-04 | 1.7E-04 | <b>1.01</b> |
| Trehalose                  | 6.8  | 9.1E-04 | 1.0E-03 | 0.99        |
| Nicotinamide N-oxide       | 6.5  | 1.3E-03 | 1.4E-03 | 0.88        |
| Methylamine                | 5.5  | 3.1E-03 | 3.4E-03 | 0.71        |
| L-Lactic acid              | 4.4  | 1.0E-02 | 1.1E-02 | 0.44        |
| L-Alpha-aminobutyric acid  | 4.3  | 1.0E-02 | 1.1E-02 | 0.72        |
| Dimethylamine              | 1.8  | 1.7E-01 | 1.7E-01 | 0.10        |
| Cholic acid                | 0.5  | 6.9E-01 | 6.9E-01 | 0.15        |

206

207 Note: F value indicates the ratio of the variance of the group means to that of the pooled within-  
208 group variance. The larger the F value, the greater the relative variance among the group means.

209 The p-value tells you the probability of obtaining an F value as extreme or more extreme as the



210 one observed under the assumption that the null hypothesis is true. FDR: value obtained after  
 211 performing a false discovery test. VIP score: variable of importance score obtained from PLS-  
 212 DA plot. VIP score >1 metabolites were considered to be contributing to the model significantly.

213 **Table S3: R<sup>2</sup> and Q<sup>2</sup> values of Partial Least Squares - Discriminant Analysis (PLS-DA).**

| Conditions                                      | Measure        | 1 comps | 2 comps | 3 comps | 4 comps | 5 comps |
|-------------------------------------------------|----------------|---------|---------|---------|---------|---------|
| Acidic-<br>Control                              | R <sup>2</sup> | 0.9     | 0.96    | 0.97    | 0.98    | 0.99    |
|                                                 | Q <sup>2</sup> | 0.87    | 0.92    | 0.92    | 0.86    | 0.78    |
| Oxidative-<br>Control                           | R <sup>2</sup> | 0.95    | 0.98    | 0.99    | 0.99    | 0.99    |
|                                                 | Q <sup>2</sup> | 0.92    | 0.92    | 0.93    | 0.92    | 0.88    |
| Starvation-<br>control                          | R <sup>2</sup> | 0.99    | 0.99    | 1       | 1       | 1       |
|                                                 | Q <sup>2</sup> | 0.98    | 0.97    | 0.98    | 0.98    | 0.98    |
| Acidic-<br>Oxidative-<br>Starvation-<br>Control | R <sup>2</sup> | 0.8     | 0.95    | 0.98    | 0.99    | 0.99    |
|                                                 | Q <sup>2</sup> | 0.77    | 0.93    | 0.95    | 0.97    | 0.97    |

214  
 215 Note: The R<sup>2</sup> value indicated goodness of fit, and Q<sup>2</sup> indicates the goodness of predictability.  
 216 A value closer to 1 indicates the accuracy of the prediction model. Comps: component  
 217

218

219 **Table S4:** Metabolic pathway impact analysis with metabolic pathways significantly influenced220 a) acidic stress *versus* control. b) oxidative stress *versus* control. c) nutrient starvation *versus*

221 control.

222 a) Metabolic pathway impact analysis: acidic stress *versus* control.

| <b>Acidic stress <i>versus</i> control</b>          | Total Cmpd <sup>a</sup> | Hits <sup>b</sup> | -log(P) <sup>c</sup> | FDR <sup>d</sup> | Impact <sup>e</sup> |
|-----------------------------------------------------|-------------------------|-------------------|----------------------|------------------|---------------------|
| Phenylalanine, tyrosine and tryptophan biosynthesis | 22                      | 2                 | 25.318               | 4.35E-10         | 0.02                |
| D-Alanine metabolism                                | 5                       | 1                 | 23.584               | 7.84E-10         | 0.00                |
| Novobiocin biosynthesis                             | 3                       | 1                 | 23.302               | 7.84E-10         | 0.00                |
| Thiamine metabolism                                 | 21                      | 1                 | 23.302               | 7.84E-10         | 0.00                |
| Phenylalanine metabolism                            | 3                       | 1                 | 23.118               | 7.84E-10         | 0.00                |
| Glycine, serine and threonine metabolism            | 28                      | 4                 | 20.306               | 1.09E-08         | 0.21                |
| Taurine and hypotaurine metabolism                  | 7                       | 3                 | 19.457               | 2.18E-08         | 0.00                |
| Valine, leucine and isoleucine degradation          | 37                      | 1                 | 19.252               | 2.34E-08         | 0.00                |
| D-Glutamine and D-glutamate metabolism              | 7                       | 2                 | 18.675               | 0.000000037      | 0.38                |
| Lysine biosynthesis                                 | 15                      | 3                 | 18.542               | 3.73E-08         | 0.00                |
| Cysteine and methionine metabolism                  | 37                      | 2                 | 18.469               | 3.73E-08         | 0.06                |
| Sulfur metabolism                                   | 13                      | 2                 | 18.169               | 4.61E-08         | 0.07                |
| Selenoamino acid metabolism                         | 16                      | 2                 | 17.287               | 0.000000103      | 0.01                |
| Pantothenate and CoA biosynthesis                   | 21                      | 3                 | 16.581               | 0.000000193      | 0.02                |
| beta-Alanine metabolism                             | 9                       | 2                 | 15.166               | 0.000000728      | 1.00                |
| Alanine, aspartate and                              | 20                      | 5                 | 15.122               | 0.000000728      | 0.69                |

|                                             |    |   |        |             |      |
|---------------------------------------------|----|---|--------|-------------|------|
| glutamate metabolism                        |    |   |        |             |      |
| Arginine and proline metabolism             | 40 | 3 | 14.979 | 0.000000791 | 0.05 |
| Valine, leucine and isoleucine biosynthesis | 26 | 2 | 14.326 | 0.00000142  | 0.02 |
| Tyrosine metabolism                         | 11 | 2 | 14.281 | 0.00000142  | 0.00 |
| Aminoacyl-tRNA biosynthesis                 | 66 | 8 | 13.426 | 0.00000318  | 0.00 |
| Propanoate metabolism                       | 21 | 2 | 13.23  | 0.00000368  | 0.00 |
| Pyrimidine metabolism                       | 37 | 2 | 13.044 | 0.00000423  | 0.11 |
| Purine metabolism                           | 66 | 5 | 12.754 | 0.00000541  | 0.14 |
| Nitrogen metabolism                         | 14 | 4 | 12.576 | 0.00000619  | 0.00 |
| Butanoate metabolism                        | 22 | 1 | 11.567 | 0.0000157   | 0.05 |
| Benzoate degradation via CoA ligation       | 10 | 1 | 11.567 | 0.0000157   | 0.00 |
| Nicotinate and nicotinamide metabolism      | 13 | 3 | 9.8877 | 8.1E-05     | 0.15 |
| Peptidoglycan biosynthesis                  | 19 | 2 | 9.0395 | 1.8E-04     | 0.08 |
| Cyanoamino acid metabolism                  | 8  | 2 | 7.5334 | 7.9E-04     | 0.00 |
| Methane metabolism                          | 13 | 1 | 6.9018 | 1.4E-03     | 0.10 |
| Lysine degradation                          | 13 | 1 | 6.6492 | 1.8E-03     | 0.00 |
| Amino sugar and nucleotide sugar metabolism | 38 | 4 | 3.9977 | 0.02        | 0.21 |
| Galactose metabolism                        | 26 | 4 | 3.3779 | 0.04        | 0.10 |
| Streptomycin biosynthesis                   | 10 | 1 | 3.2292 | 0.05        | 0.22 |
| Polyketide sugar unit biosynthesis          | 5  | 1 | 3.2292 | 0.05        | 0.00 |
| Citrate cycle (TCA cycle)                   | 20 | 2 | 3.1543 | 0.05        | 0.12 |
| Pentose and                                 | 26 | 2 | 2.6266 | 0.08        | 0.01 |

|                                         |    |   |        |      |      |
|-----------------------------------------|----|---|--------|------|------|
| glucuronateinterconversions             |    |   |        |      |      |
| Starch and sucrose metabolism           | 30 | 5 | 2.173  | 0.13 | 0.39 |
| Pyruvate metabolism                     | 21 | 2 | 2.1177 | 0.13 | 0.08 |
| Glycolysis or Gluconeogenesis           | 30 | 4 | 1.8442 | 0.17 | 0.02 |
| Glyoxylate and dicarboxylate metabolism | 22 | 2 | 1.6469 | 0.20 | 0.43 |
| Ascorbate and aldarate metabolism       | 8  | 1 | 1.0865 | 0.35 | 0.00 |
| Glutathione metabolism                  | 17 | 1 | 0.4176 | 0.66 | 0.00 |

223

224 Note: <sup>a</sup> Total number of metabolites in the pathway, <sup>b</sup> Number of matched metabolites, <sup>c</sup> -log(P) is  
225 the negative natural log of the P value for each pathway, <sup>d</sup> False Discovery Rate (Benjamini-  
226 Hochberg), <sup>e</sup> Impact: The Impact is the pathway impact value calculated from pathway topology  
227 analysis. Pathways with pathway-impact values  $\geq 0.1$ , p-value ( $p < 0.05$ ), and false discovery rate  
228 (FDR) ( $FDR < 0.05$ ) were considered to be perturbed significantly

229

230 **b) Metabolic pathway impact analysis: oxidative stress *versus* control.**

| <b>oxidative <i>versus</i> control</b>   | Total Cmpd <sup>a</sup> | Hits <sup>b</sup> | -log(P) <sup>c</sup> | FDR <sup>d</sup> | Impact <sup>e</sup> |
|------------------------------------------|-------------------------|-------------------|----------------------|------------------|---------------------|
| Glutathione metabolism                   | 17                      | 1                 | 26.8                 | 9.4814E-11       | 0.00                |
| Nicotinate and nicotinamide metabolism   | 13                      | 3                 | 21.6                 | 8.6862E-09       | 0.15                |
| Nitrogen metabolism                      | 14                      | 4                 | 19.8                 | 3.6832E-08       | 0.00                |
| Glycine, serine and threonine metabolism | 28                      | 4                 | 19.1                 | 4.6296E-08       | 0.21                |
| Lysine biosynthesis                      | 15                      | 3                 | 19.0                 | 4.6296E-08       | 0.00                |

|                                             |    |   |      |            |      |
|---------------------------------------------|----|---|------|------------|------|
| D-Glutamine and D-glutamate metabolism      | 7  | 2 | 18.4 | 7.413E-08  | 0.38 |
| Amino sugar and nucleotide sugar metabolism | 38 | 4 | 18.1 | 8.2151E-08 | 0.21 |
| Aminoacyl-tRNA biosynthesis                 | 66 | 8 | 17.4 | 1.5592E-07 | 0.00 |
| Arginine and proline metabolism             | 40 | 3 | 17.0 | 2.0177E-07 | 0.05 |
| Purine metabolism                           | 66 | 5 | 16.2 | 3.5045E-07 | 0.14 |
| Alanine, aspartate and glutamate metabolism | 20 | 5 | 16.2 | 3.5045E-07 | 0.69 |
| Pantothenate and CoA biosynthesis           | 21 | 3 | 15.8 | 5.0472E-07 | 0.02 |
| beta-Alanine metabolism                     | 9  | 2 | 15.6 | 5.0554E-07 | 1.00 |
| Cysteine and methionine metabolism          | 37 | 2 | 15.6 | 5.0554E-07 | 0.06 |
| Lysine degradation                          | 13 | 1 | 15.5 | 5.0675E-07 | 0.00 |
| Cyanoamino acid metabolism                  | 8  | 2 | 15.0 | 8.0805E-07 | 0.00 |
| Peptidoglycan biosynthesis                  | 19 | 2 | 12.7 | 0.00000772 | 0.08 |
| Pyrimidine metabolism                       | 37 | 2 | 7.1  | 0.00       | 0.11 |
| Starch and sucrose metabolism               | 30 | 5 | 4.8  | 0.02       | 0.39 |
| Taurine and hypotaurine metabolism          | 7  | 3 | 4.1  | 0.04       | 0.00 |
| Pentose and glucuronate interconversions    | 26 | 2 | 3.2  | 0.08       | 0.01 |
| Pyruvate metabolism                         | 21 | 2 | 3.2  | 0.08       | 0.08 |
| Glycolysis or Gluconeogenesis               | 30 | 4 | 3.0  | 0.09       | 0.02 |

|                                                     |    |   |     |      |      |
|-----------------------------------------------------|----|---|-----|------|------|
| Selenoamino acid metabolism                         | 16 | 2 | 3.0 | 0.09 | 0.01 |
| Novobiocin biosynthesis                             | 3  | 1 | 2.8 | 0.11 | 0.00 |
| Thiamine metabolism                                 | 21 | 1 | 2.8 | 0.11 | 0.00 |
| Streptomycin biosynthesis                           | 10 | 1 | 2.6 | 0.11 | 0.22 |
| Polyketide sugar unit biosynthesis                  | 5  | 1 | 2.6 | 0.11 | 0.00 |
| Galactosemetabolism                                 | 26 | 4 | 2.5 | 0.12 | 0.10 |
| Ascorbate and aldarate metabolism                   | 8  | 1 | 2.5 | 0.12 | 0.00 |
| D-Alanine metabolism                                | 5  | 1 | 2.4 | 0.13 | 0.00 |
| Phenylalanine, tyrosine and tryptophan biosynthesis | 22 | 2 | 2.4 | 0.13 | 0.02 |
| Sulfur metabolism                                   | 13 | 2 | 2.2 | 0.14 | 0.07 |
| Methane metabolism                                  | 13 | 1 | 1.5 | 0.28 | 0.10 |
| Tyrosine metabolism                                 | 11 | 2 | 1.4 | 0.31 | 0.00 |
| Valine, leucine and isoleucine degradation          | 37 | 1 | 1.1 | 0.40 | 0.00 |
| Butanoate metabolism                                | 22 | 1 | 0.7 | 0.55 | 0.05 |
| Benzoate degradation via CoA ligation               | 10 | 1 | 0.7 | 0.55 | 0.00 |
| Glyoxylate and dicarboxylate metabolism             | 22 | 2 | 0.7 | 0.56 | 0.43 |
| Phenylalanine metabolism                            | 3  | 1 | 0.6 | 0.61 | 0.00 |
| Citrate cycle (TCA cycle)                           | 20 | 2 | 0.4 | 0.68 | 0.12 |
| Valine, leucine and isoleucine biosynthesis         | 26 | 2 | 0.4 | 0.69 | 0.02 |
| Propanoate metabolism                               | 21 | 2 | 0.3 | 0.75 | 0.00 |

232 Note: <sup>a</sup> Total number of metabolites in the pathway, <sup>b</sup> Number of matched metabolites, <sup>c</sup>-log(P) is  
 233 the negative natural log of the P value for each pathway, <sup>d</sup> False Discovery Rate (Benjamini-  
 234 Hochberg),<sup>e</sup> Impact: The Impact is the pathway impact value calculated from pathway topology  
 235 analysis. Pathways with pathway-impact values  $\geq 0.1$ , p-value ( $p < 0.05$ ), and false discovery rate  
 236 (FDR) ( $FDR < 0.05$ ) were considered to be perturbed significantly

237

238 c) Metabolic pathway impact analysis: nutrient starvation *versus* control.

| nutrient starvation <i>versus</i> control   | Total Cmpd <sup>a</sup> | Hits <sup>b</sup> | -log(P) <sup>c</sup> | FDR <sup>d</sup> | Impact <sup>e</sup> |
|---------------------------------------------|-------------------------|-------------------|----------------------|------------------|---------------------|
| Aminoacyl-tRNA biosynthesis                 | 66                      | 8                 | 37.035               | 2.2896E-15       | 0.00                |
| Cyanoamino acid metabolism                  | 8                       | 2                 | 36.778               | 2.2896E-15       | 0.00                |
| Nitrogen metabolism                         | 14                      | 4                 | 35.437               | 5.8368E-15       | 0.00                |
| Alanine, aspartate and glutamate metabolism | 20                      | 5                 | 34.855               | 7.8364E-15       | 0.69                |
| Phenylalanine metabolism                    | 3                       | 1                 | 33.132               | 3.5122E-14       | 0.00                |
| Taurine and hypotaurine metabolism          | 7                       | 3                 | 28.881               | 2.0525E-12       | 0.00                |
| Arginine and proline metabolism             | 40                      | 3                 | 28.064               | 3.9833E-12       | 0.05                |
| Pantothenate and CoA biosynthesis           | 21                      | 3                 | 26.985               | 1.025E-11        | 0.02                |
| beta-Alanine metabolism                     | 9                       | 2                 | 26.768               | 1.1328E-11       | 1.00                |
| Glycolysis or Gluconeogenesis               | 30                      | 4                 | 25.904               | 2.4188E-11       | 0.02                |
| Peptidoglycan biosynthesis                  | 19                      | 2                 | 24.457               | 9.34E-11         | 0.08                |
| Nicotinate and nicotinamide                 | 13                      | 3                 | 21.797               | 1.224E-09        | 0.15                |

|                                                     |    |   |        |            |      |
|-----------------------------------------------------|----|---|--------|------------|------|
| metabolism                                          |    |   |        |            |      |
| Purine metabolism                                   | 66 | 5 | 21.231 | 1.9908E-09 | 0.14 |
| Selenoamino acid metabolism                         | 16 | 2 | 20.546 | 3.6656E-09 | 0.01 |
| Propanoate metabolism                               | 21 | 2 | 19.606 | 8.7585E-09 | 0.00 |
| Phenylalanine, tyrosine and tryptophan biosynthesis | 22 | 2 | 19.39  | 1.0194E-08 | 0.02 |
| Pyrimidine metabolism                               | 37 | 2 | 19.329 | 1.0195E-08 | 0.11 |
| Amino sugar and nucleotide sugar metabolism         | 38 | 4 | 19.114 | 1.1938E-08 | 0.21 |
| Tyrosine metabolism                                 | 11 | 2 | 18.768 | 1.5985E-08 | 0.00 |
| D-Alanine metabolism                                | 5  | 1 | 18.664 | 1.6856E-08 | 0.00 |
| Glycine, serine and threonine metabolism            | 28 | 4 | 18.275 | 2.3685E-08 | 0.21 |
| Citrate cycle (TCA cycle)                           | 20 | 2 | 18.082 | 2.7415E-08 | 0.12 |
| Lysine biosynthesis                                 | 15 | 3 | 17.871 | 3.2389E-08 | 0.00 |
| Novobiocin biosynthesis                             | 3  | 1 | 17.783 | 3.2549E-08 | 0.00 |
| Thiamine metabolism                                 | 21 | 1 | 17.783 | 3.2549E-08 | 0.00 |
| Cysteine and methionine metabolism                  | 37 | 2 | 16.842 | 8.0151E-08 | 0.06 |
| Glyoxylate and dicarboxylate metabolism             | 22 | 2 | 16.204 | 1.4619E-07 | 0.43 |
| Glutathione metabolism                              | 17 | 1 | 16.099 | 1.5653E-07 | 0.00 |
| Lysine degradation                                  | 13 | 1 | 15.943 | 1.7658E-07 | 0.00 |
| Pentose and glucuronate interconversions            | 26 | 2 | 15.885 | 1.8096E-07 | 0.01 |
| Galactose metabolism                                | 26 | 4 | 15.317 | 3.0892E-07 | 0.10 |
| Butanoate metabolism                                | 22 | 1 | 15.232 | 3.1595E-07 | 0.05 |
| Benzoate degradation via CoA ligation               | 10 | 1 | 15.232 | 3.1595E-07 | 0.00 |



|                                             |    |   |        |            |      |
|---------------------------------------------|----|---|--------|------------|------|
| Ascorbate and aldarate metabolism           | 8  | 1 | 14.17  | 8.8741E-07 | 0.00 |
| D-Glutamine and D-glutamate metabolism      | 7  | 2 | 13.302 | 2.0523E-06 | 0.38 |
| Streptomycin biosynthesis                   | 10 | 1 | 12.493 | 4.3623E-06 | 0.22 |
| Polyketide sugar unit biosynthesis          | 5  | 1 | 12.493 | 4.3623E-06 | 0.00 |
| Methane metabolism                          | 13 | 1 | 7.6449 | 5.4E-04    | 0.10 |
| Starch and sucrose metabolism               | 30 | 5 | 6.8585 | 1.2E-03    | 0.39 |
| Sulfur metabolism                           | 13 | 2 | 6.3757 | 1.8E-03    | 0.07 |
| Pyruvate metabolism                         | 21 | 2 | 6.0924 | 2.4E-03    | 0.08 |
| Valine, leucine and isoleucine biosynthesis | 26 | 2 | 5.3424 | 4.9E-03    | 0.02 |
| Valine, leucine and isoleucine degradation  | 37 | 1 | 3.6576 | 0.02580    | 0.00 |

239

240 Note: <sup>a</sup> Total number of metabolites in the pathway, <sup>b</sup> Number of matched metabolites, <sup>c</sup>-log(P) is  
241 the negative natural log of the P value for each pathway, <sup>d</sup> False Discovery Rate (Benjamini-  
242 Hochberg), <sup>e</sup> Impact: The Impact is the pathway impact value calculated from pathway topology  
243 analysis. Pathways with pathway-impact values  $\geq 0.1$ , p-value ( $p < 0.05$ ), and false discovery rate  
244 (FDR) ( $FDR < 0.05$ ) were considered to be perturbed significantly

245

246 **Table S5: Pre-processing method to perform standard statistical analysis**

| Pre-Processing Method | Acidic - Control | Oxidative- Control | Starvation- Control | Acidic- Oxidative- Control |
|-----------------------|------------------|--------------------|---------------------|----------------------------|
| Normalization         | ----             | Sum                | ----                | Sum                        |

|                |        |           |        |      |
|----------------|--------|-----------|--------|------|
| Transformation | ----   | Cube Root | ----   | ---- |
| scaling        | Pareto | Pareto    | Pareto | Auto |

247

248

249 **Table S6: Primers used in the study**

| Gene name                                                                          | Sequence (5'-3')      | Annealing Temperature (°C) |
|------------------------------------------------------------------------------------|-----------------------|----------------------------|
| TrimethylamineBiosynthesis synthesis pathways in <i>M. smegmatis</i><br>RT primers |                       |                            |
| 2,4-DCA MSMEG_5124FP                                                               | AGATCGTCTGTTTGGCAAC   | 58                         |
| 2,4-DCAMSMEG_5124RP                                                                | GATCACTCAGCAGCGGAC    | 58                         |
| YeaXMSMEG_4371RTFP                                                                 | AGAGATCCACGAGCAGTT    | 57                         |
| YeaXMSMEG_4371RTRP                                                                 | CTGCGGGAGCACCTCGAC    | 57                         |
| TR2Fe-2SMSMEG_0657FP                                                               | TGCTCGTCCATCCATCCCG   | 57                         |
| TR2Fe-2SMSMEG_0657RP                                                               | GACGGCCAGCGGTGTCAT    | 57                         |
|                                                                                    |                       |                            |
| Endogenous controls <i>M. smegmatis</i>                                            |                       |                            |
| MSMEG_2758 sigAFP                                                                  | GAAGACACCGACCTGGAAC   | 55                         |
| MSMEG_2758 sigA RP                                                                 | GACTCTTCCTCGTCCCACAC  | 55                         |
|                                                                                    |                       |                            |
| Primers for cloning of <i>M. smegmatis</i> MSMEG_5124 gene.                        |                       |                            |
| MSMEG_5124FP                                                                       | 5'-GTGACATACCCGAACCTG | 58                         |
| MSMEG_5124RP                                                                       | 3'-CTACAGGCGCGCGGCGAG | 58                         |

250

251
